# Supplementary material
Source: Springer Nature journal article supplement (https://www.springermedizin.de/resource/supplementary/12914_2011_169_MOESM2_ESM.pdf/9536918)
Supplement: MOESM2 [file 9536918]

### Personal Documents

- In order to obtain a health insurance card, one needs to register with the authorities and obtain an ID card (Lične Karta).
- The following documentation is required;
- Proof of residence (a permanent Serbian address)
- AND one of the following;
- Birth certificate, IDP card, Work booklet, Marriage certificate, Citizenship card

### Availability

- The specific services that are required must be available through the healthcare system.
- The targets chosen in this research are all addressable through the primary healthcare system in Serbia.

### Geographic Accessibility

- In order to access services, a patient must be able to get to either a general practitioner, primary care centre (dom zdravlja) or polyclinic. They can travel via public transport, private transport, or on foot.

### Affordability of Medical Services

- The user of the healthcare service must pay a small user fee

### Acceptability

- Acceptability by provider and patient
- Providers must be willing to treat the patient
- Providers must recognize that a problem exists with their patient AND
- Patients must recognize the importance of the treatment or intervention provided
- If the intervention is acceptable to the patient, then the patient should correctly adhere to the treatment regime

### Affordability of intervention

- Patients must be able to afford the medications that are prescribed to them

### Efficacy

- Utilization is only effective if the treatment prescribed is efficacious
